# Supplementary material for: Understanding the interaction of DNA–RNA nucleobases with different ZnO nanomaterials
Source: Royal Society of Chemistry journal article supplement (doi:10.1039/c4cp01041h), 2014-01-01
Supplement: c4cp01041h1.pdf [file c4cp01041h1.pdf]

# **Understanding the interaction of DNA-RNA Nucleobases with different ZnO Nanomaterials**

Supriya Saha and Pranab Sarkar\*

*Department of Chemistry, Visva-Bharati University, Santiniketan- 731235, India*

E-mail: pranab.sarkar@visva-bharati.ac.in

---

\*To whom correspondence should be addressed

Table 1: Mulliken charge analysis ( $\delta q$ ) for Guanine due to interaction with ZnO nanoparticles

|                 | Isolated | With<br>(ZnO) <sub>3</sub> NW | With<br>ZnO(10 $\bar{1}$ 0) surface | With<br>ZnO(30,0) NT | With<br>(ZnO) <sub>96</sub> QD |
|-----------------|----------|-------------------------------|-------------------------------------|----------------------|--------------------------------|
| O <sub>1</sub>  | -0.511   | -0.465                        | -0.489                              | -0.449               | -0.438                         |
| N <sub>2</sub>  | -0.469   | -0.285                        | -0.278                              | -0.332               | -0.336                         |
| N <sub>3</sub>  | -0.244   | -0.232                        | -0.222                              | -0.242               | -0.239                         |
| N <sub>4</sub>  | -0.288   | -0.265                        | -0.300                              | -0.195               | -0.172                         |
| N <sub>5</sub>  | -0.087   | -0.086                        | -0.062                              | -0.046               | -0.046                         |
| N <sub>6</sub>  | -0.364   | -0.264                        | -0.240                              | -0.244               | -0.212                         |
| C <sub>7</sub>  | 0.423    | 0.406                         | 0.397                               | 0.435                | 0.428                          |
| C <sub>8</sub>  | 0.486    | 0.491                         | 0.493                               | 0.509                | 0.509                          |
| C <sub>9</sub>  | 0.195    | 0.188                         | 0.189                               | 0.188                | 0.184                          |
| C <sub>10</sub> | -0.087   | -0.059                        | -0.065                              | -0.078               | -0.061                         |
| C <sub>11</sub> | 0.058    | 0.111                         | 0.099                               | 0.114                | 0.129                          |
| H <sub>12</sub> | 0.078    | 0.099                         | 0.092                               | 0.125                | 0.127                          |
| H <sub>13</sub> | 0.197    | 0.272                         | 0.223                               | 0.240                | 0.235                          |
| H <sub>14</sub> | 0.206    | 0.222                         | 0.219                               | 0.246                | 0.237                          |
| H <sub>15</sub> | 0.193    | 0.197                         | 0.200                               | 0.214                | 0.217                          |
| H <sub>16</sub> | 0.213    | 0.272                         | 0.252                               | 0.238                | 0.239                          |
| Total           | 0.000    | 0.602                         | 0.508                               | 0.723                | 0.801                          |

Table 2: Mulliken charge analysis ( $\delta q$ ) for Cytosine due to interaction with ZnO nanoparticles

|                 | Isolated | With<br>(ZnO) <sub>3</sub> NW | With<br>ZnO(10 $\bar{1}$ 0) surface | With<br>ZnO(30,0) NT | With<br>(ZnO) <sub>96</sub> QD |
|-----------------|----------|-------------------------------|-------------------------------------|----------------------|--------------------------------|
| O <sub>1</sub>  | -0.557   | -0.472                        | -0.511                              | -0.500               | -0.445                         |
| N <sub>2</sub>  | -0.469   | -0.333                        | -0.379                              | -0.335               | -0.388                         |
| N <sub>3</sub>  | -0.161   | -0.134                        | -0.178                              | -0.146               | -0.173                         |
| N <sub>4</sub>  | -0.326   | -0.305                        | -0.211                              | -0.200               | -0.267                         |
| C <sub>5</sub>  | -0.303   | -0.263                        | -0.335                              | -0.282               | -0.328                         |
| C <sub>6</sub>  | 0.366    | 0.406                         | 0.339                               | 0.338                | 0.412                          |
| C <sub>7</sub>  | 0.073    | 0.075                         | 0.196                               | 0.115                | 0.168                          |
| C <sub>8</sub>  | 0.601    | 0.620                         | 0.630                               | 0.624                | 0.602                          |
| H <sub>9</sub>  | 0.207    | 0.229                         | 0.247                               | 0.242                | 0.238                          |
| H <sub>10</sub> | 0.073    | 0.092                         | 0.073                               | 0.107                | 0.127                          |
| H <sub>11</sub> | 0.092    | 0.109                         | 0.125                               | 0.118                | 0.124                          |
| H <sub>12</sub> | 0.193    | 0.234                         | 0.203                               | 0.205                | 0.231                          |
| H <sub>13</sub> | 0.211    | 0.233                         | 0.223                               | 0.226                | 0.236                          |
| Total           | 0.000    | 0.491                         | 0.422                               | 0.512                | 0.537                          |

Table 3: Mulliken charge analysis ( $\delta q$ ) for Thymine due to interaction with ZnO nanoparticles

|                 | Isolated | With<br>(ZnO) <sub>3</sub> NW | With<br>ZnO(10 $\bar{1}$ 0) surface | With<br>ZnO(30,0) NT | With<br>(ZnO) <sub>96</sub> QD |
|-----------------|----------|-------------------------------|-------------------------------------|----------------------|--------------------------------|
| O <sub>1</sub>  | -0.554   | -0.495                        | -0.496                              | -0.478               | -0.463                         |
| O <sub>2</sub>  | -0.496   | -0.435                        | -0.438                              | -0.432               | -0.408                         |
| N <sub>3</sub>  | -0.185   | -0.164                        | -0.164                              | -0.174               | -0.122                         |
| N <sub>4</sub>  | -0.262   | -0.385                        | -0.382                              | -0.214               | -0.206                         |
| C <sub>5</sub>  | 0.569    | 0.599                         | 0.602                               | 0.585                | 0.591                          |
| C <sub>6</sub>  | 0.486    | 0.521                         | 0.524                               | 0.499                | 0.493                          |
| C <sub>7</sub>  | -0.001   | 0.00009                       | 0.00047                             | 0.009                | -0.007                         |
| C <sub>8</sub>  | -0.149   | -0.138                        | -0.139                              | -0.129               | -0.089                         |
| C <sub>9</sub>  | -0.169   | -0.175                        | -0.174                              | -0.175               | -0.181                         |
| H <sub>10</sub> | 0.083    | 0.081                         | 0.078                               | 0.102                | 0.087                          |
| H <sub>11</sub> | 0.083    | 0.092                         | 0.091                               | 0.088                | 0.123                          |
| H <sub>12</sub> | 0.058    | 0.059                         | 0.056                               | 0.065                | 0.081                          |
| H <sub>13</sub> | 0.087    | 0.088                         | 0.087                               | 0.099                | 0.122                          |
| H <sub>14</sub> | 0.232    | 0.327                         | 0.319                               | 0.266                | 0.252                          |
| H <sub>15</sub> | 0.217    | 0.218                         | 0.217                               | 0.228                | 0.239                          |
| Total           | 0.000    | 0.193                         | 0.181                               | 0.339                | 0.512                          |

Table 4: Mulliken charge analysis ( $\delta q$ ) for Uracil due to interaction with ZnO nanoparticles

|                 | Isolated | With<br>(ZnO) <sub>3</sub> NW | With<br>ZnO(10 $\bar{1}$ 0) surface | With<br>ZnO(30,0) NT | With<br>(ZnO) <sub>96</sub> QD |
|-----------------|----------|-------------------------------|-------------------------------------|----------------------|--------------------------------|
| O <sub>1</sub>  | -0.550   | -0.493                        | -0.493                              | -0.479               | -0.491                         |
| O <sub>2</sub>  | -0.494   | -0.433                        | -0.437                              | -0.412               | -0.405                         |
| N <sub>3</sub>  | -0.181   | -0.163                        | -0.162                              | -0.166               | -0.067                         |
| N <sub>4</sub>  | -0.262   | -0.385                        | -0.382                              | -0.215               | -0.178                         |
| C <sub>5</sub>  | 0.573    | 0.603                         | 0.606                               | 0.589                | 0.595                          |
| C <sub>6</sub>  | 0.503    | 0.539                         | 0.541                               | 0.512                | 0.566                          |
| C <sub>7</sub>  | 0.044    | 0.044                         | 0.044                               | 0.063                | 0.193                          |
| C <sub>8</sub>  | -0.287   | -0.277                        | -0.278                              | -0.282               | -0.228                         |
| H <sub>9</sub>  | 0.085    | 0.086                         | 0.085                               | 0.098                | 0.099                          |
| H <sub>10</sub> | 0.119    | 0.119                         | 0.114                               | 0.130                | 0.121                          |
| H <sub>11</sub> | 0.232    | 0.326                         | 0.319                               | 0.270                | 0.235                          |
| H <sub>12</sub> | 0.218    | 0.219                         | 0.218                               | 0.229                | 0.225                          |
| Total           | 0.000    | 0.185                         | 0.175                               | 0.337                | 0.665                          |
